# Supplementary material for: The human anti-HIV antibodies 2F5, 2G12, and PG9 differ in their susceptibility to proteolytic degradation: Down-regulation of endogenous serine and cysteine proteinase activities could improve antibody production in plant-based expression platforms
Source: PubMed Central journal article supplement — Biotechnol J. 2014 Jan 29;9(4):493–500. doi: 10.1002/biot.201300207 (PMC4162989; doi:10.1002/biot.201300207), 2014-01-29
Supplement: biot0009-0493-SD1.pdf [file biot0009-0493-SD1.pdf]

Supporting Information for DOI 10.1002/biot.201300207

**The human anti-HIV antibodies 2F5, 2G12 and PG9 differ in their susceptibility to proteolytic degradation: Down-regulation of endogenous serine and cysteine proteinase activities could improve antibody production in plant-based expression platforms**

---

*Melanie Niemer, Ulrich Mehofer, Juan Antonio Torres Acosta, Maria Verdianz, Theresa Henkel, Andreas Loos, Richard Strasser, Daniel Maresch, Thomas Rademacher, Herta Steinkellner and Lukas Mach*

**Table S1.** Sequences of 2F5, 2G12 and PG9 heavy and light chains. CDR H3 loops (green), V<sub>H</sub>-C<sub>H1</sub> linker segments (turquoise) and C<sub>H1</sub>-C<sub>H2</sub> hinge regions (yellow) are highlighted by coloured backgrounds. Identified cleavage sites are indicated by red arrows.

2F5 (heavy chain):

RITLKESGPPLVKPTQTLTLTCSFSGFSLSDFGVGVGWIRQPPGKALEWLAIIYSDDDKRYSPLNTRLTIT  
KDTSKNQVVLVMTRVSPVDTATYFCAHRRGPTTLF↓G↓VPIARGPVNAMDVWGQGITVTIS↓STSTKGP  
SVFPLAPSSKSTSGGTAALGCLVKDYFPEPVTVSWNSGALTSGVHTFPAVLQSSGLYLSVVVTPSSSL  
GTQTYICNVNHKPSNTKVD↓K↓KV↓EPKSCD↓KTH↓TCP↓PCPAPELLGGPSVFLFPPKPKDTLMISRTPEVT  
CVVVDVSHEDPEVKFNWYVDGVEVHNAKTKPREEQYNSTYRVVSVLTVLHQDWLNGKEYKCKVSN  
KAFPAPIEKTISKAKGQPREPQVYTLPPSRDELTKNQVSLTCLVKGFYPSDIAVEWESNGQPENNYKTP  
PVLDSGDSFFLYSKLTVDKSRWQQGNVFCFSVMHEALHNHYTQKSLSLSPGK

2F5 (light chain):

ALQLTQSPSSLSASVGDRTITCRASQGVTSALAWYRQKPGSPPQLLIYDASSLESGVPSRFSGSGSGTEF  
TLTISTLRPEDFATYYCQQLHFYPHTFGGGTRVDVRRVTAAPS VFIFPPSDEQLKSGTASVCLLNNFYF  
REAKVQWKVDNALQSGNSQESVTEQDSKDYSLSSSTLTLKADYKHKVYACEVTHQGLSSPVTKSF  
NRGEC

2F5-KDEL (heavy chain):

RITLKESGPPLVKPTQTLTLTCSFSGFSLSDFGVGVGWIRQPPGKALEWLAIIYSDDDKRYSPLNTRLTIT  
KDTSKNQVVLVMTRVSPVDTATYFCAHRRGPTTLFGVPIARGPVNAMDVWGQGITVTISSTSTKGPSVF  
PLAPSSKSTSGGTAALGCLVKDYFPEPVTVSWNSGALTSGVHTFPAVLQSSGLYLSVVVTPSSSLGTQ  
TYICNVNHKPSNTKVDKVEPKSCDKTHTCP↓PCPAPELLGGPSVFLFPPKPKDTLMISRTPEVTCVVVDV  
SHEDPEVKFNWYVDGVEVHNAKTKPREEQYNSTYRVVSVLTVLHQDWLNGKEYKCKVSNKAFPAPIE  
KTISKAKGQPREPQVYTLPPSRDELTKNQVSLTCLVKGFYPSDIAVEWESNGQPENNYKTPPVLDSG  
SFFLYSKLTVDKSRWQQGNVFCFSVMHEALHNHYTQKSLSLSPGKSEKDEL

2F5-KDEL (light chain):

ALQLTQSPSSLSASVGDRTITCRASQGVTSALAWYRQKPGSPPQLLIYDASSLESGVPSRFSGSGSGTEF  
TLTISTLRPEDFATYYCQQLHFYPHTFGGGTRVDVRRVTAAPS VFIFPPSDEQLKSGTASVCLLNNFYF  
REAKVQWKVDNALQSGNSQESVTEQDSKDYSLSSSTLTLKADYKHKVYACEVTHQGLSSPVTKSF  
NRGECSEKDEL

2G12 (heavy chain):

EVQLVESGGGLVKAGGSLILSCGVSNFRISAHTMNWVRRVPGGGLEWVASISTSSTYRDYADAVKGRF  
TVSRDDEDFVYLQMHKMRVEDTAIYYCAR↓GSDRLSDNDPFDA↓WGPG↓TVVTVSPA↓STKGPSVFPLA  
PSSKSTSGGTAALGCLVKDYFPEPVTVSWNSGALTSGVHTFPAVLQSSGLYLSVVVTPSSSLGTQTYI  
CNVNHKPSNTKVDKVV↓EPKSCDKTHTCP↓PCPAPELLGGPSVFLFPPKPKDTLMISRTPEVTCVVVDVSH  
EDPEVKFNWYVDGVEVHNAKTKPREEQYNSTYRVVSVLTVLHQDWLNGKEYKCKVSNKAFPAPIEKT  
ISKAKGQPREPQVYTLPPSRDELTKNQVSLTCLVKGFYPSDIAVEWESNGQPENNYKTPPVLDSGDSFF  
LYSKLTVDKSRWQQGNVFCFSVMHEALHNHYTQKSLSLSPGK

2G12 (light chain):

AVVMTQSPSTLSASVGDRTITCRASQSIETWLAWYQKPGKAPKLLIYKASTLKTGVPSRFSGSGSGTE  
FTLTISGLQFDDFATYHCQHYAGYSATFGQGTRVEIKRTVAAPS VFIFPPSDEQLKSGTASVCLLNNFY  
PREAKVQWKVDNALQSGNSQESVTEQDSKDYSLSSSTLTLKADYKHKVYACEVTHQGLSSPVTKSF  
FNRGEC

PG9 (heavy chain):

QRLVESGGGVVPGSSRLSCAASGFDFSRQGMHWVRQAPGGLEWVAFIKYDGESEKYHADS VWGR  
LSISRDNKDTLYLQMNSLRVEDTATYFCVREAGGPDYRNGYNY↓D↓FYDGYNYHYMDVWGKGT  
TVTVSSA↓STKGPSVFPLAPSSKSTSGGTAALGCLVKDYFPEPVTVSWNSGALTSGVHTFPAVLQSSGLYS  
LSSVVVTPSSSLGTQTYICNVNHKPSNTKVDKVV↓EPKSCDKTHTCP↓PCPAPELLGGPSVFLFPPKPKDTL  
MISRTPEVTCVVVDVSHEDPEVKFNWYVDGVEVHNAKTKPREEQYNSTYRVVSVLTVLHQDWLNGK  
EYKCKVSNKALPAPIEKTISKAKGQPREPQVYTLPPSRDELTKNQVSLTCLVKGFYPSDIAVEWESNGQP  
ENNYKTPPVLDSGDSFFLYSKLTVDKSRWQQGNVFCFSVMHEALHNHYTQKSLSLSPGK

PG9 (light chain):

QSALTQPASVSGSPGQSITISCQGTSDNDVGGYESVSWYQQHPGKAPKVVIYDVSKRPSGVS NRFSGSKS  
GNTASLTISGLQAEDEGDYCYCKSLTSTRRRVFGTGTCLTVLGQPKAAPS VTLFPPSSEELQANKATLVCL

ISDFYPGAVTVAWKADSSPVKAGVETTTPSKQSNNKYAASSYLSLTPEQWKSHKSYSCQVTHEGSTVE  
KTVAPTECS

PG9-KDEL (heavy chain):

QRLVESGGGVVQPGSSLRLSCAASGFDFSRQGMHWVRQAPGQGLEWVAFIKYDGSEKYHADSVWGR  
LSISRDNSKDTLYLQMNSLRVEDTATYFCVREAGGPDYRNGYNYDFYDGYNYHYMDVWGKGTTV  
TVSSASTKGPSVFPLAPSSKSTSGGTAALGCLVKDYFPEPVTVSWNSGALTSGVHTFPAVLQSSGLYSLS  
SVVTVPSSSLGTQTYICNVNHKPSNTKVDKKEPKSCDKTHTCPPCPAPELLGGPSVFLFPPKPKDTLMI  
SRTPEVTCVVVDVSHEDPEVKFNWYVDGVEVHNAKTKPREEQYNSTYRVVSVLTVLHQDWLNGKEY  
KCKVSNKALPAPIEKTISKAKGQPREPQVYTLPPSRDELTKNQVSLTCLVKGFYPSDIAVEWESNGQPEN  
NYKTTTPVLDSDGSFFLYSKLTVDKSRWQQGNVFSCVMHEALHNHYTQKSLSLSPGKKDEL

PG9-KDEL (light chain):

QSALTQPASVSGSPGQSITISCQGTSNDVGGYESVSWYQQHPGKAPKVVIYDVSKRPSGVSNRFGSKS  
GNTASLTISGLQAEDEGDYCKSLTSTRRRVFGTGTKLTVLGQPKAAPSVTLPSPSEELQANKATLVCL  
ISDFYPGAVTVAWKADSSPVKAGVETTTPSKQSNNKYAASSYLSLTPEQWKSHKSYSCQVTHEGSTVE  
KTVAPTECSKDEL

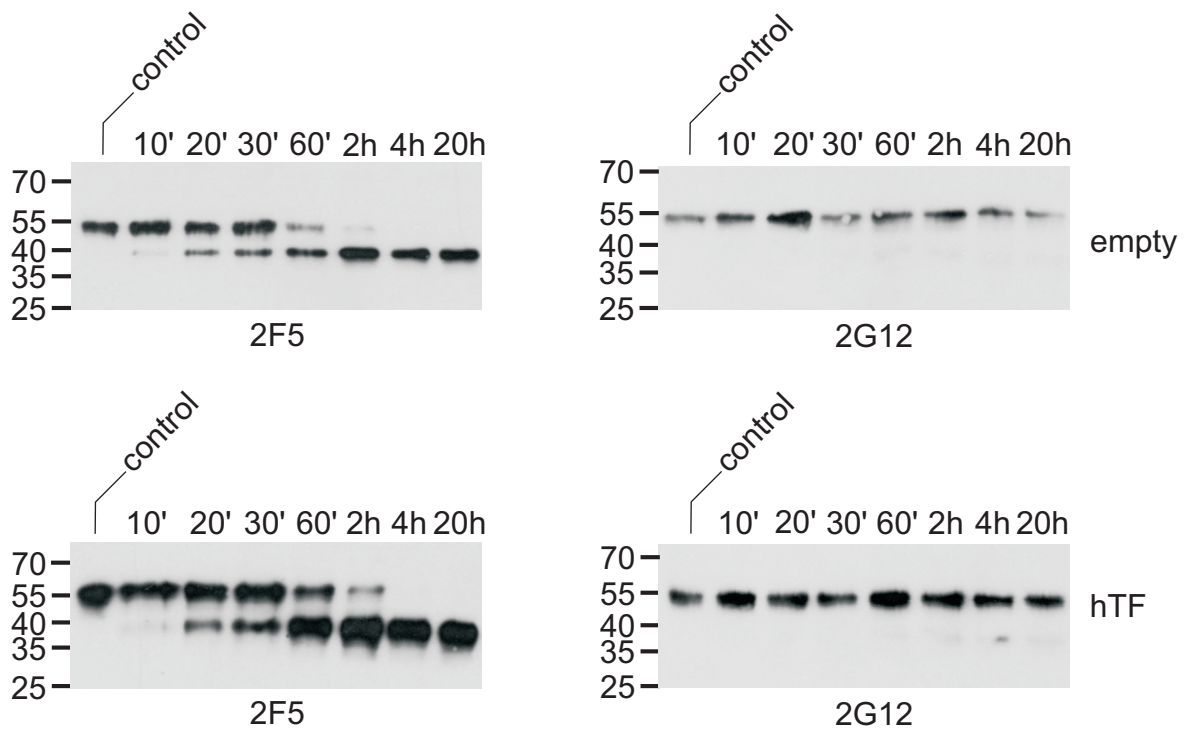

**Figure S1.** Processing of 2F5 and 2G12 by *N. benthamiana* proteinases *in vitro*. CHO-derived 2F5 or 2G12 (200 ng) was incubated with intercellular fluid (650 ng protein) prepared from leaves infiltrated with *A. tumefaciens* carrying an expression vector for human transferrin (hTF) or the parental bacterial strain (empty) for the indicated times and then analysed by immunoblotting with antibodies to the heavy chain of human IgG. Untreated antibody was loaded as control. The migration positions of selected molecular mass standards are indicated, with their respective masses expressed in kDa.

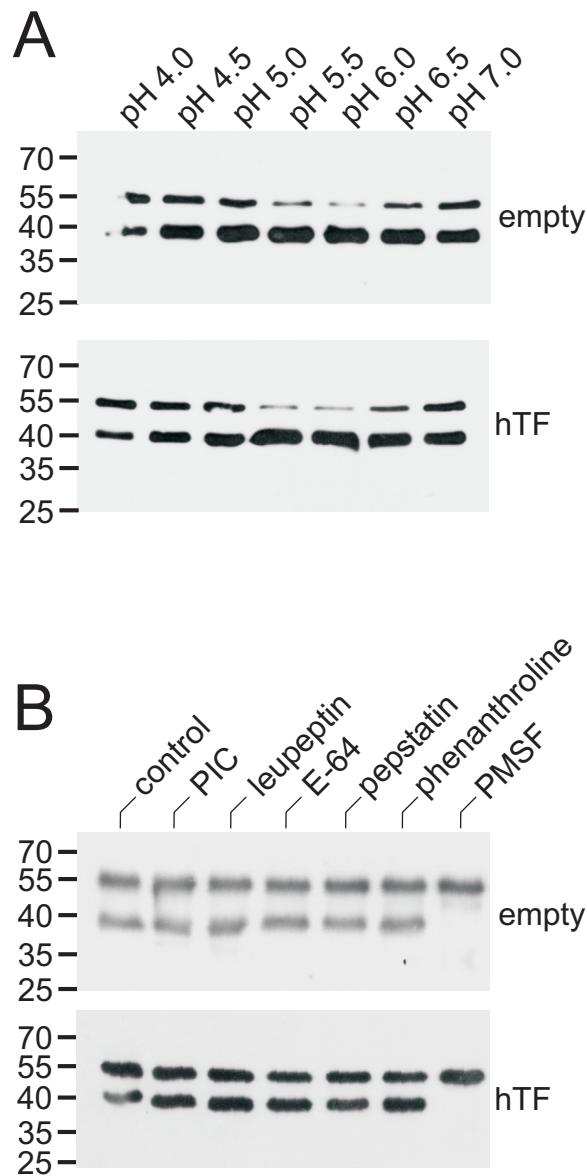

**Figure S2.** Effect of pH and proteinase inhibitors on *in vitro* processing of 2F5. **(A)** CHO-derived 2F5 (200 ng) was incubated with intercellular fluid (650 ng protein) prepared from leaves infiltrated with *A. tumefaciens* carrying an expression vector for human transferrin (hTF) or the parental bacterial strain (empty) for 2 h at the indicated pH and then analysed by immunoblotting with antibodies to the heavy chain of human IgG. **(B)** CHO-derived 2F5 (200 ng) was incubated with intercellular fluid (IF; 330 ng protein) for 2 h in the absence (control) or presence of the indicated proteinase inhibitors (10  $\mu$ M: leupeptin, E-64, pepstatin; 2 mM: PMSF, phenanthroline) and then analysed as above. PIC, proteinase inhibitor cocktail. The migration positions of selected molecular mass standards are indicated, with their respective masses expressed in kDa.

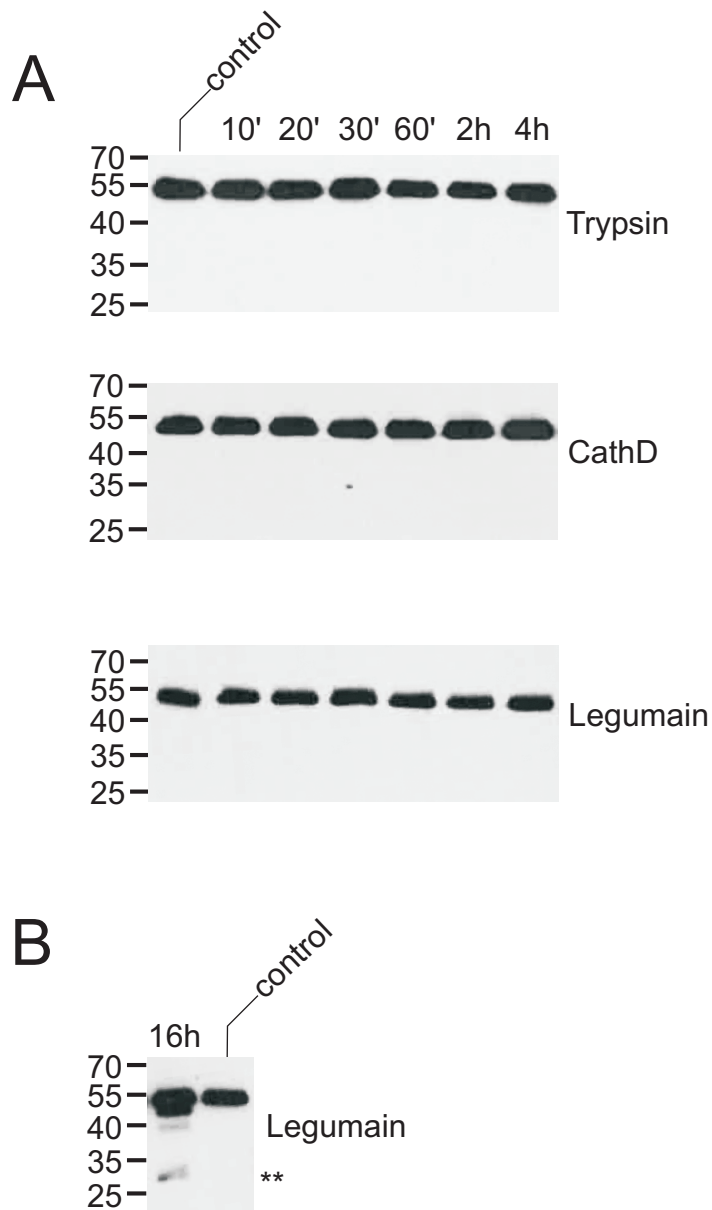

**Figure S3.** Processing of 2F5 *in vitro*. **(A)** CHO-derived 2F5 (200 ng) was incubated with selected proteinases (10 ng) at pH 5.5 for the indicated times and then analysed by immunoblotting with antibodies to the heavy chain of human IgG. Untreated antibody was used as a control. CathD, cathepsin D. **(B)** CHO-derived 2F5 (200 ng) was incubated with legumain (250 ng) for 16 h at pH 5.5 and then analysed as above. Untreated antibody was used as a control. \*\*, 30-kDa degradation product. The migration positions of selected molecular mass standards are indicated, with their respective masses expressed in kDa.
